# Supplementary material for: Chromosome-scale genome assembly of Astragalus membranaceus using PacBio and Hi-C technologies
Source: PubMed Central journal article supplement — Sci Data. 2024 Oct 2;11:1071. doi: 10.1038/s41597-024-03852-6 (PMC11446949; doi:10.1038/s41597-024-03852-6), 2024-10-02

Chr0708:57,791,451-57,825,451

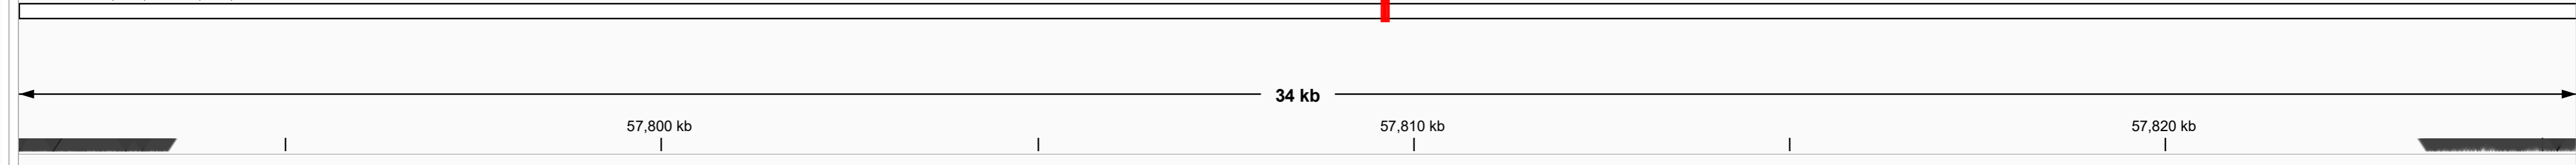

Chr07-08\_57763451\_57853451.bam  
overage

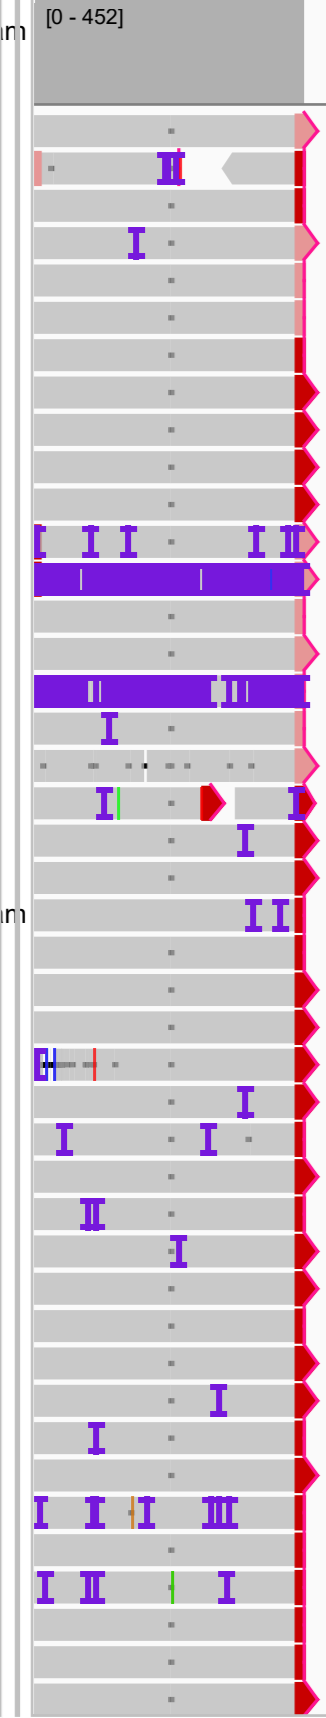

Chr07-08\_57763451\_57853451.bam

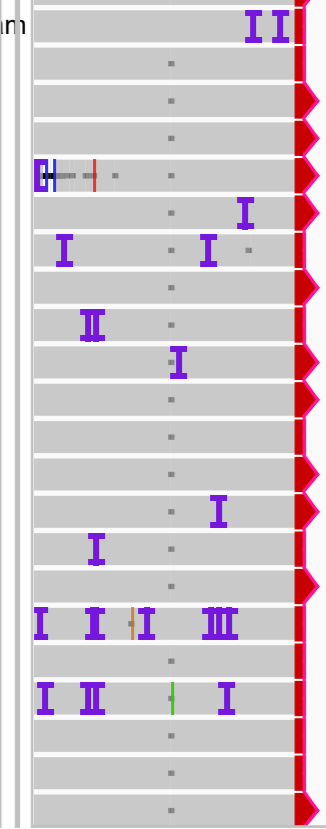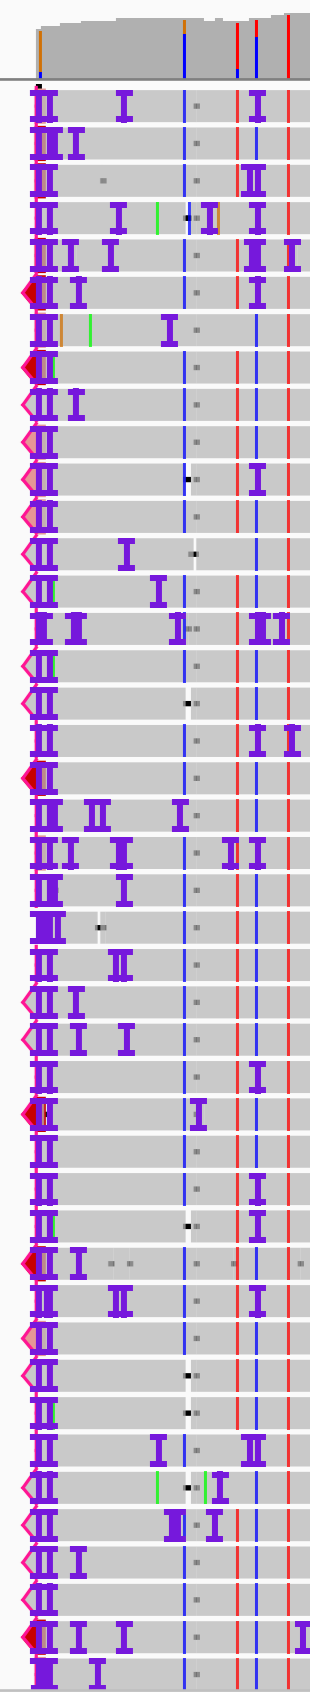

Supplement: 41597_2024_3852_MOESM1_ESM.pdf [file 41597_2024_3852_MOESM1_ESM.pdf]
