# Supplementary material for: Chromosome-scale genome assembly of Astragalus membranaceus using PacBio and Hi-C technologies
Source: PubMed Central journal article supplement — Sci Data. 2024 Oct 2;11:1071. doi: 10.1038/s41597-024-03852-6 (PMC11446949; doi:10.1038/s41597-024-03852-6), 2024-10-02
Supplement: 41597_2024_3852_MOESM2_ESM.pdf [file 41597_2024_3852_MOESM2_ESM.pdf]

Chr09:95,114,824-95,123,789

8,967 bp

95,116,000 bp

95,117,000 bp

95,118,000 bp

95,119,000 bp

95,120,000 bp

95,121,000 bp

95,122,000 bp

95,123,000 bp

AM.Chr09.bam Coverage

[0 - 10.00]

AM.Chr09.bam

175
